# Supplementary material for: CdTe0.5S0.5/ZnS Quantum Dots Embedded in a Molecularly Imprinted Polymer for the Selective Optosensing of Dopamine
Source: PubMed Central journal article supplement (PMC6566530; doi:10.3390/nano9050693), 2019-05-03
Supplement: nanomaterials-09-00693-s001.pdf [file nanomaterials-09-00693-s001.pdf]

## SUPPORTING INFORMATION

# CdTe<sub>0.5</sub>S<sub>0.5</sub>/ZnS Quantum Dots Embedded in a Molecularly Imprinted Polymer for the Selective Optosensing of Dopamine

Kiana Khadem-Abbassi <sup>1</sup>, Hervé Rinnert <sup>2</sup>, Lavinia Balan <sup>3</sup>, Zahra Doumandji <sup>2</sup>, Olivier Joubert <sup>2</sup>, Majid Masteri-Farahani <sup>1</sup> and Raphaël Schneider <sup>4,\*</sup>

<sup>1</sup> Faculty of Chemistry, Kharazmi University, 15719-14911 Tehran, Iran; nature.ph.111@gmail.com (K.K.-A), mfarahani@khu.ac.ir (M.M.-F.)

<sup>2</sup> Institut Jean Lamour, UMR CNRS 7198, Université de Lorraine, F-54000 Nancy, France; herve.rinnert@univ-lorraine.fr (H.R.), zahra-manel.doumandji@univ-lorraine.fr (Z.D.), olivier.joubert@univ-lorraine.fr (O.J.)

<sup>3</sup> Institut de Science des Matériaux de Mulhouse, CNRS, UMR 7361, 15 rue Jean Starcky, 68093 Mulhouse, France; lavinia.balan@uha.fr

<sup>4</sup> Laboratoire Réactions et Génie des Procédés, Université de Lorraine, CNRS, LRGP, F-54000 Nancy, France;

\* Correspondence: raphael.schneider@univ-lorraine.fr; Tel.: +33-372743790

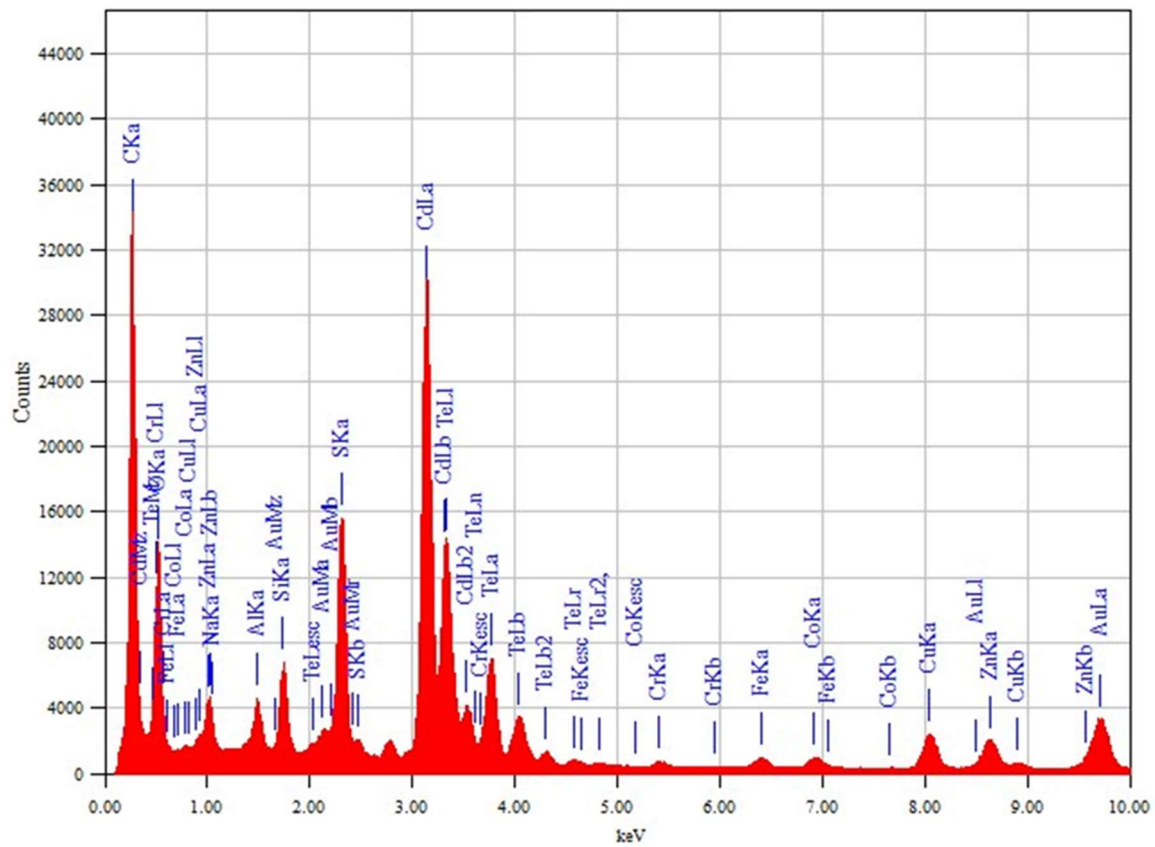

Figure S1. EDX spectrum of CdTe<sub>0.5</sub>S<sub>0.5</sub>/ZnS@MIP particles.
